# Supplementary material
Source: publisher site journal article supplement (https://www.dovepress.com/article/336418)
Supplement: Supplementary file 1 [file get_supplementary_file.php]

## Supplemental materials

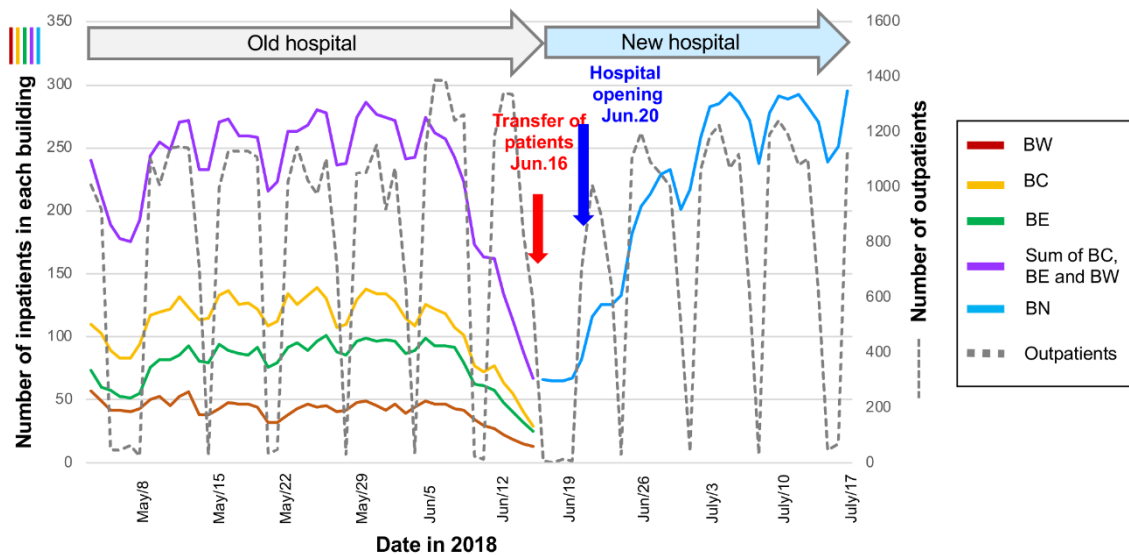

**Figure S1. The transition of the number of outpatients and hospitalized patients.**

Graph represents the transition of the number of outpatients and hospitalized patients from May 1 to July 17, 2018. The number of beds were 65, 0, 148, 106, and 319 for BW, BA, BC, BE, and BN, respectively. Due to the inauguration of the new hospital in June 2018, the number of hospitalized patients gradually decreased, and 67 hospitalized patients (BC: 29, BE: 25, BW: 13 patients) were transferred to the BN on June 16, 2018. The number of hospitalized patients reached the same number of patients as that in the old hospital two weeks after the opening of the new hospital. The number of outpatients at the old hospital was approximately 1000-1200 on weekdays. Outpatient treatment was suspended from June 16 to 19 before opening of the new hospital. The number of patients gradually recovered to the original number after re-opening.

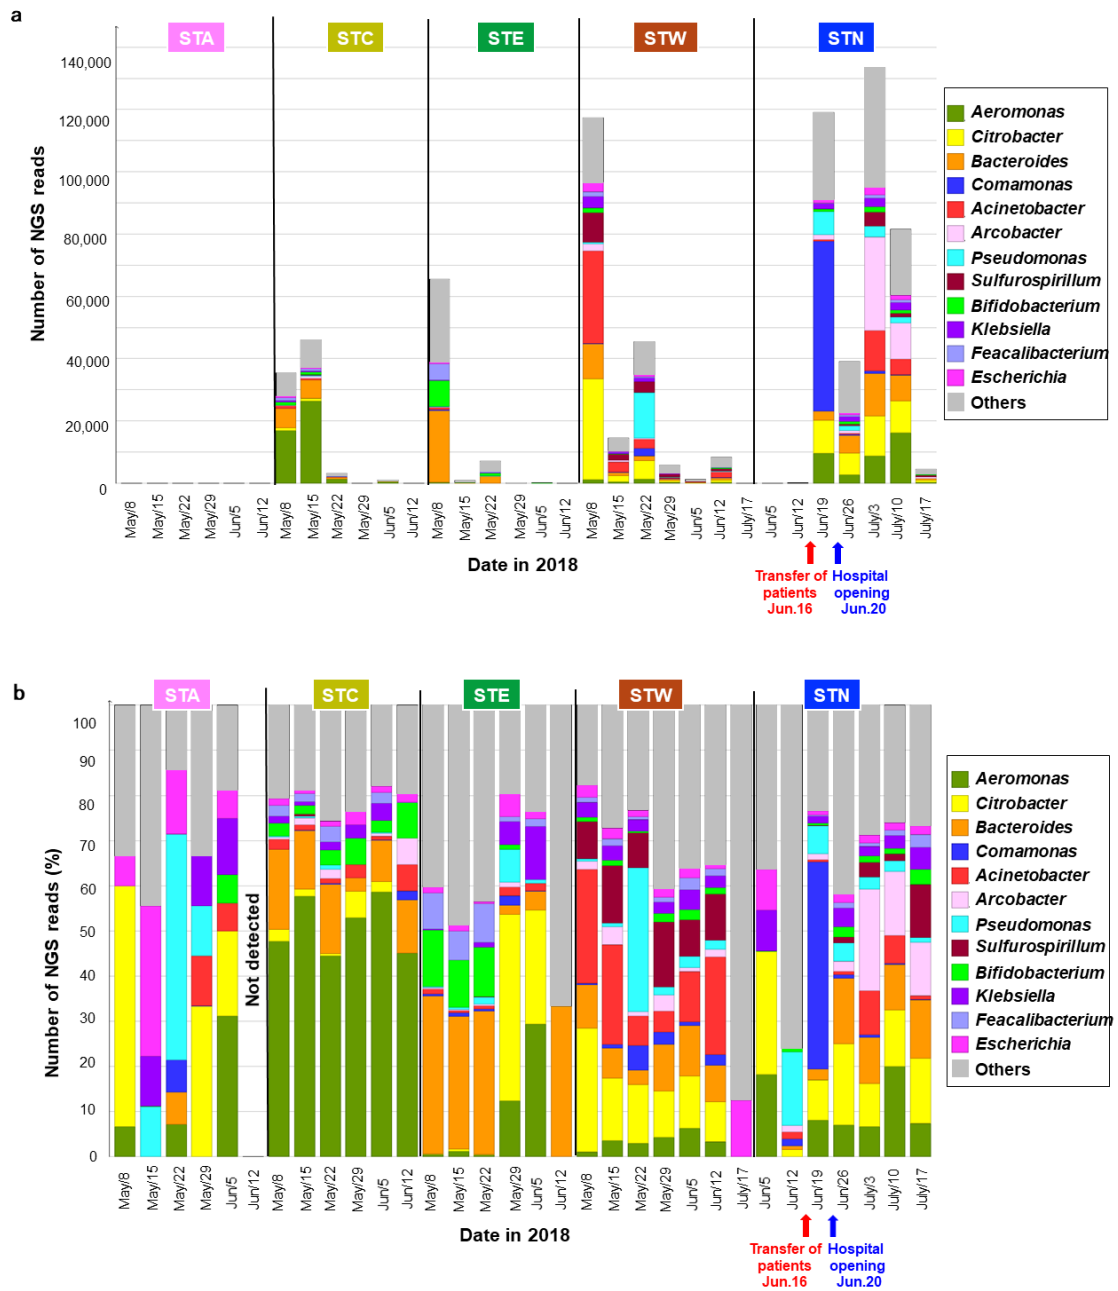

**Figure S2. Metagenomic analysis of sewage samples in each building.**

NGS reads were classified based on the bacterial genus taxonomy and the graph displayed actual NGS read counts (a) and relative proportion (b) of each bacterial genus.

The actual NGS read counts were very low compared with other sewage samples in the sewage tank of BA (STA).

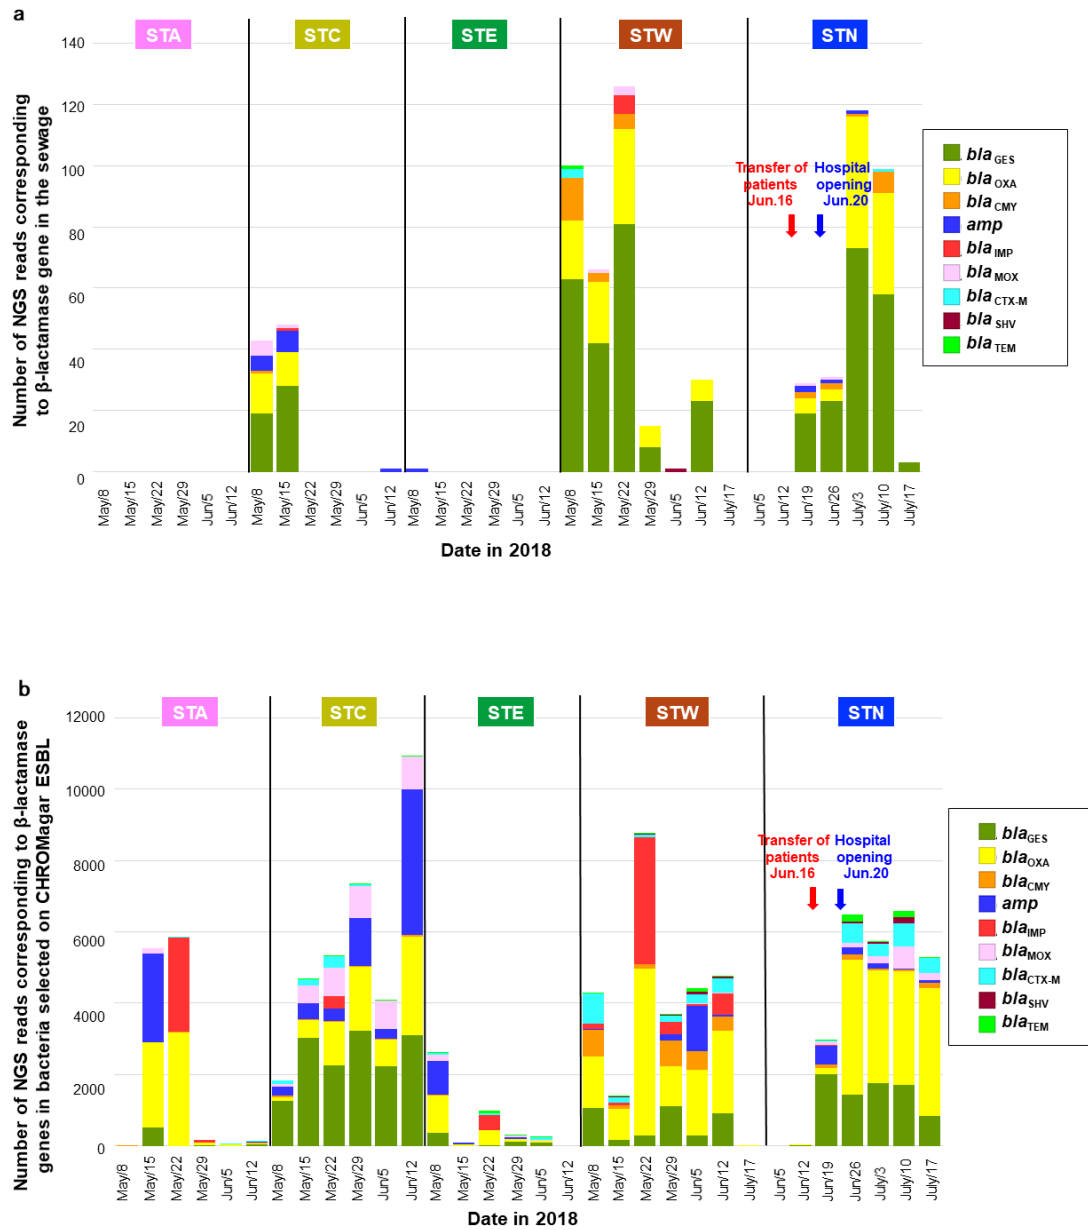

**Figure S3. NGS read counts corresponding to  $\beta$ -lactamase genes in each sewage tank.**

The metagenome read counts corresponding to  $\beta$ -lactamase gene of (a) the sewage samples and (b) that of the grown bacteria on CHROMagar ESBL is displayed. The read counts of *bla*<sub>CTX-M</sub> gene in original sewages were not significant (panel a), but selection on

CHROMagar ESBL resulted in increasing detection of CTX-M-positive organisms in STN, after relocation to the new building (June 20, 2018).

**Table S1. Bacteria isolates growing on CHROMagar ESBL**

| Bacteria species                    | Hospital sewage tank |                      | Clinical isolate <sup>c</sup> |
|-------------------------------------|----------------------|----------------------|-------------------------------|
|                                     | STW0522 <sup>a</sup> | STN0717 <sup>b</sup> |                               |
| <i>Escherichia coli</i>             | 1                    | 20                   | 16                            |
| <i>Klebsiella pneumoniae</i>        | 2                    |                      | 3                             |
| <i>Klebsiella aerogenes</i>         |                      | 1                    |                               |
| <i>Klebsiella michiganensis</i>     |                      |                      | 1                             |
| <i>Klebsiella quasipneumoniae</i>   | 1                    |                      |                               |
| <i>Klebsiella variicola</i>         | 1                    |                      |                               |
| <i>Klebsiella sp.</i>               | 2                    |                      |                               |
| <i>Enterobacter kobei</i>           | 21                   | 2                    |                               |
| <i>Enterobacter bugandensis</i>     |                      | 12                   |                               |
| <i>Enterobacter hormaechei</i>      | 3                    | 1                    |                               |
| <i>Enterobacter cloacae</i>         |                      | 3                    |                               |
| <i>Enterobacter roggenkampii</i>    | 1                    |                      |                               |
| <i>Citrobacter portucalensis</i>    | 16                   | 39                   |                               |
| <i>Citrobacter freundii</i>         | 20                   |                      |                               |
| <i>Achromobacter xylosoxidans</i>   | 5                    |                      |                               |
| <i>Pseudomonas monteiii</i>         | 3                    |                      |                               |
| <i>Raoultella planticola</i>        | 1                    |                      |                               |
| <i>Stenotrophomonas maltophilia</i> | 1                    |                      |                               |

<sup>a</sup>STW0522: sewage tank of west building at 22th May 2018

<sup>b</sup>STN0717: sewage tank of new building at 17th July 2018.

<sup>c</sup>Clinical isolate: patients from 8, May 2018 to 17th July 2018

**Table S2. Serotype of ESBL-producing *E.coli* in sewage and clinical isolate**

| Sequence type | Serotype | Hospital sewage tank  |                       | Clinical isolate <sup>c</sup> |
|---------------|----------|-----------------------|-----------------------|-------------------------------|
|               |          | STW 0522 <sup>a</sup> | STN 0717 <sup>b</sup> |                               |
| ST12          | O4:H1    |                       |                       | 1                             |
| ST38          | O86:H18  |                       | 5                     | 3                             |
| ST73          | O6:H1    |                       |                       | 1                             |
| ST131         | O25:H4   |                       |                       | 5                             |
| ST224         | O8:H23   | 1                     |                       |                               |
| ST393         | O15:H1   |                       | 14                    | 2                             |
| ST1011        | O130:H10 |                       |                       | 4                             |
| ST9586        | O8:H10   |                       | 1                     |                               |

<sup>a</sup>STW0522; sewage tank of west building at 22th May 2018

<sup>b</sup>STN0717; sewage tank of new building at 17th July 2018.

<sup>c</sup>Clinically isolate; clinically isolate from 8th May 2018 to 17th July 2018

## Data Set S1. Metagenome DNA-Seq of sewage samples

| Sample Name              | BioProject | BioSample    | Run       |
|--------------------------|------------|--------------|-----------|
| STA-180508               | PRJDB9036  | SAMD00195117 | DRR199824 |
| STA-180515               | PRJDB9036  | SAMD00195118 | DRR199825 |
| STA-180522               | PRJDB9036  | SAMD00195119 | DRR199826 |
| STA-180529               | PRJDB9036  | SAMD00195120 | DRR199827 |
| STA-180605               | PRJDB9036  | SAMD00195121 | DRR199828 |
| STA-180612               | PRJDB9036  | SAMD00195122 | DRR199829 |
| STC-180508               | PRJDB9036  | SAMD00195123 | DRR199830 |
| STC-180515               | PRJDB9036  | SAMD00195124 | DRR199831 |
| STC-180522               | PRJDB9036  | SAMD00195125 | DRR199832 |
| STC-180529               | PRJDB9036  | SAMD00195126 | DRR199833 |
| STC-180605               | PRJDB9036  | SAMD00195127 | DRR199834 |
| STC-180612               | PRJDB9036  | SAMD00195128 | DRR199835 |
| STE-180508               | PRJDB9036  | SAMD00195129 | DRR199836 |
| STE-180515               | PRJDB9036  | SAMD00195130 | DRR199837 |
| STE-180522               | PRJDB9036  | SAMD00195131 | DRR199838 |
| STE-180529               | PRJDB9036  | SAMD00195132 | DRR199839 |
| STE-180605               | PRJDB9036  | SAMD00195133 | DRR199840 |
| STE-180612               | PRJDB9036  | SAMD00195134 | DRR199841 |
| STW-180508               | PRJDB9036  | SAMD00195135 | DRR199842 |
| STW-180515               | PRJDB9036  | SAMD00195136 | DRR199843 |
| STW-180522               | PRJDB9036  | SAMD00195137 | DRR199844 |
| STW-180529               | PRJDB9036  | SAMD00195138 | DRR199845 |
| STW-180605               | PRJDB9036  | SAMD00195139 | DRR199846 |
| STW-180612               | PRJDB9036  | SAMD00195140 | DRR199847 |
| STW-180717               | PRJDB9036  | SAMD00195141 | DRR199848 |
| STN-180605               | PRJDB9036  | SAMD00195142 | DRR199849 |
| STN-180612               | PRJDB9036  | SAMD00195143 | DRR199850 |
| STN-180619               | PRJDB9036  | SAMD00195144 | DRR199851 |
| STN-180626               | PRJDB9036  | SAMD00195145 | DRR199852 |
| STN-180703               | PRJDB9036  | SAMD00195146 | DRR199853 |
| STN-180710               | PRJDB9036  | SAMD00195147 | DRR199854 |
| STN-180717               | PRJDB9036  | SAMD00195148 | DRR199855 |
| STA-CHROMagarESBL-180508 | PRJDB9036  | SAMD00195149 | DRR199856 |
| STA-CHROMagarESBL-180515 | PRJDB9036  | SAMD00195150 | DRR199857 |
| STA-CHROMagarESBL-180522 | PRJDB9036  | SAMD00195151 | DRR199858 |
| STA-CHROMagarESBL-180529 | PRJDB9036  | SAMD00195152 | DRR199859 |
| STA-CHROMagarESBL-180605 | PRJDB9036  | SAMD00195153 | DRR199860 |
| STA-CHROMagarESBL-180612 | PRJDB9036  | SAMD00195154 | DRR199861 |
| STC-CHROMagarESBL-180508 | PRJDB9036  | SAMD00195155 | DRR199862 |
| STC-CHROMagarESBL-180515 | PRJDB9036  | SAMD00195156 | DRR199863 |
| STC-CHROMagarESBL-180522 | PRJDB9036  | SAMD00195157 | DRR199864 |
| STC-CHROMagarESBL-180529 | PRJDB9036  | SAMD00195158 | DRR199865 |
| STC-CHROMagarESBL-180605 | PRJDB9036  | SAMD00195159 | DRR199866 |
| STC-CHROMagarESBL-180612 | PRJDB9036  | SAMD00195160 | DRR199867 |
| STE-CHROMagarESBL-180508 | PRJDB9036  | SAMD00195161 | DRR199868 |
| STE-CHROMagarESBL-180515 | PRJDB9036  | SAMD00195162 | DRR199869 |
| STE-CHROMagarESBL-180522 | PRJDB9036  | SAMD00195163 | DRR199870 |
| STE-CHROMagarESBL-180529 | PRJDB9036  | SAMD00195164 | DRR199871 |
| STE-CHROMagarESBL-180605 | PRJDB9036  | SAMD00195165 | DRR199872 |
| STE-CHROMagarESBL-180612 | PRJDB9036  | SAMD00195166 | DRR199873 |
| STW-CHROMagarESBL-180508 | PRJDB9036  | SAMD00195167 | DRR199874 |
| STW-CHROMagarESBL-180515 | PRJDB9036  | SAMD00195168 | DRR199875 |
| STW-CHROMagarESBL-180522 | PRJDB9036  | SAMD00195169 | DRR199876 |
| STW-CHROMagarESBL-180529 | PRJDB9036  | SAMD00195170 | DRR199877 |
| STW-CHROMagarESBL-180605 | PRJDB9036  | SAMD00195171 | DRR199878 |
| STW-CHROMagarESBL-180612 | PRJDB9036  | SAMD00195172 | DRR199879 |
| STW-CHROMagarESBL-180717 | PRJDB9036  | SAMD00195173 | DRR199880 |
| STN-CHROMagarESBL-180605 | PRJDB9036  | SAMD00195174 | DRR199881 |
| STN-CHROMagarESBL-180612 | PRJDB9036  | SAMD00195175 | DRR199882 |
| STN-CHROMagarESBL-180619 | PRJDB9036  | SAMD00195176 | DRR199883 |
| STN-CHROMagarESBL-180626 | PRJDB9036  | SAMD00195177 | DRR199884 |
| STN-CHROMagarESBL-180703 | PRJDB9036  | SAMD00195178 | DRR199885 |
| STN-CHROMagarESBL-180710 | PRJDB9036  | SAMD00195179 | DRR199886 |
| STN-CHROMagarESBL-180717 | PRJDB9036  | SAMD00195180 | DRR199887 |
